# Supplementary material
Source: Springer Nature journal article supplement (https://www.springermedizin.de/resource/supplementary/12885_2013_4651_MOESM3_ESM.pdf/9466806)

**A.**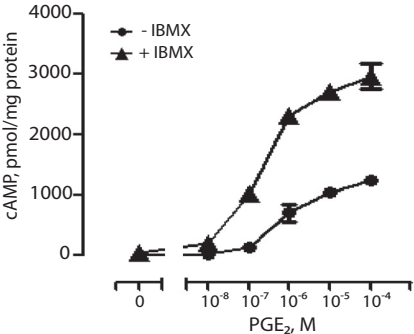**B.**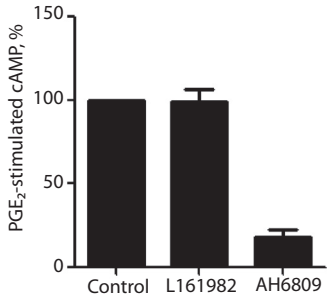

Supplement: MOESM3 [file 9466806]
